# Supplementary material for: On the importance of π-stacking interactions in the complexes of copper and zinc bearing pyridine-2,6-dicarboxylic acid N-oxide and N-donor auxiliary ligands
Source: Royal Society of Chemistry journal article supplement (doi:10.1039/d2ce00656a), 2022-01-01
Supplement: d2ce00656a1.pdf [file d2ce00656a1.pdf]

## Supplementary Information for Manuscript

### **On the importance of $\pi$ -stacking interactions in the complexes of copper and zinc bearing pyridine-2,6-dicarboxylic acid *N*-oxide and *N*-donor auxiliary ligands**

Maryam Bazargan<sup>a</sup>, Masoud Mirzaei<sup>a,\*</sup>, Abdul Samad Hamid<sup>a,†</sup>, Zahra Heydaralizadeh Kafshdar<sup>a,†</sup>, Hoda Ziaekhodadadian<sup>a,†</sup>, Elham Momenzadeh<sup>a,†</sup>, Joel T. Mague,<sup>b</sup> Rosa M. Gomila<sup>c</sup>, Antonio Frontera<sup>c,\*</sup>, Diego M. Gil<sup>d</sup>

<sup>a</sup> *Department of Chemistry, Faculty of Science, Ferdowsi University of Mashhad, Mashhad 9177948974, Iran. E-mail: mirzaeesh@um.ac.ir.*

<sup>b</sup> *Department of Chemistry, Tulane University, New Orleans, LA, 70118, USA.*

<sup>c</sup> *Departament de Química, Universitat de les Illes Balears, Crta de Valldemossa km 7.5, 07122 Palma de Mallorca (Balears), SPAIN. E-mail: [toni.frontera@uib.es](mailto:toni.frontera@uib.es).*

<sup>d</sup> *INBIOFAL (CONICET – UNT). Instituto de Química Orgánica. Facultad de Bioquímica, Química y Farmacia. Universidad Nacional de Tucumán. Ayacucho 471. T4000INI. San Miguel de Tucumán. Argentina.*

*† These authors contributed equally to this work.*

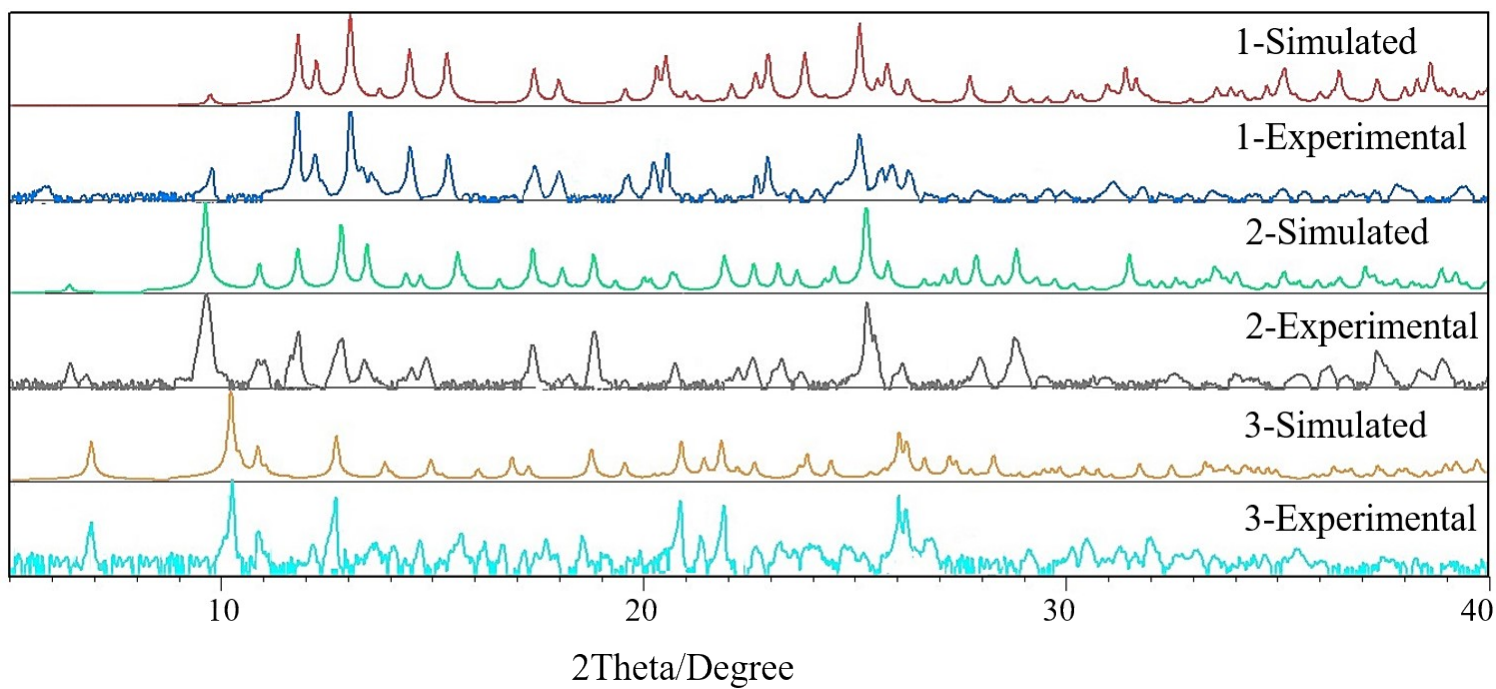

**Fig. S1.** PXRD results (simulated and experimental) for 1-3.

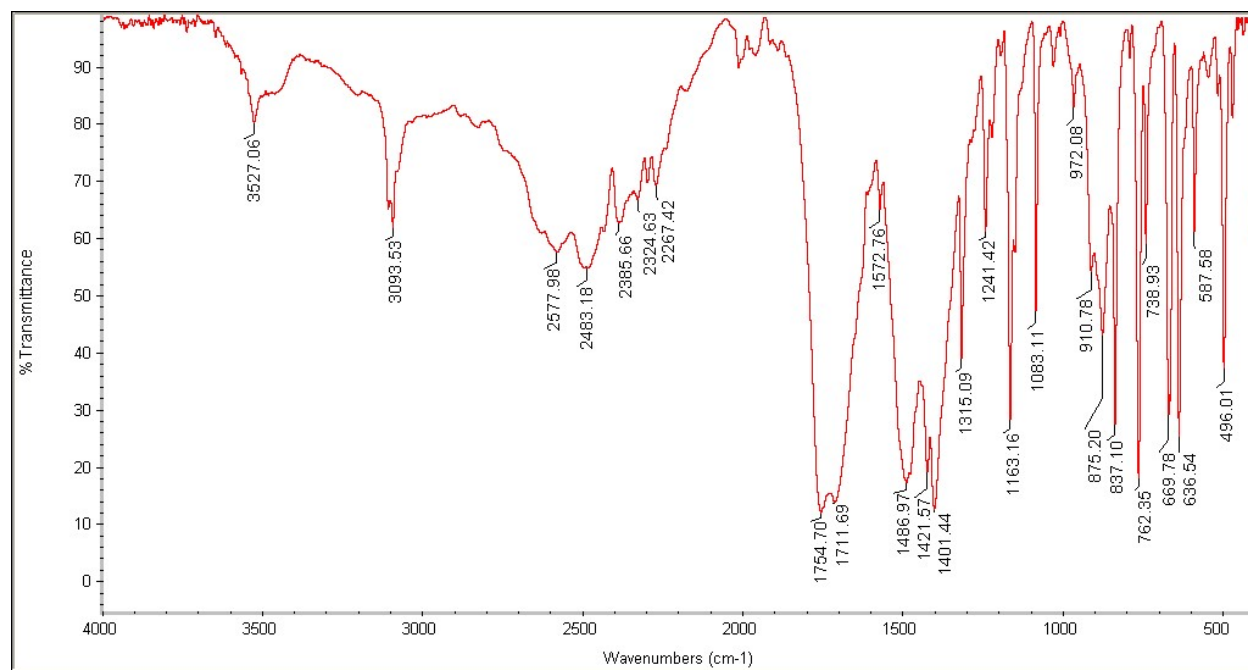

**Fig. S2.** FTIR spectrum of H<sub>2</sub>pydco.

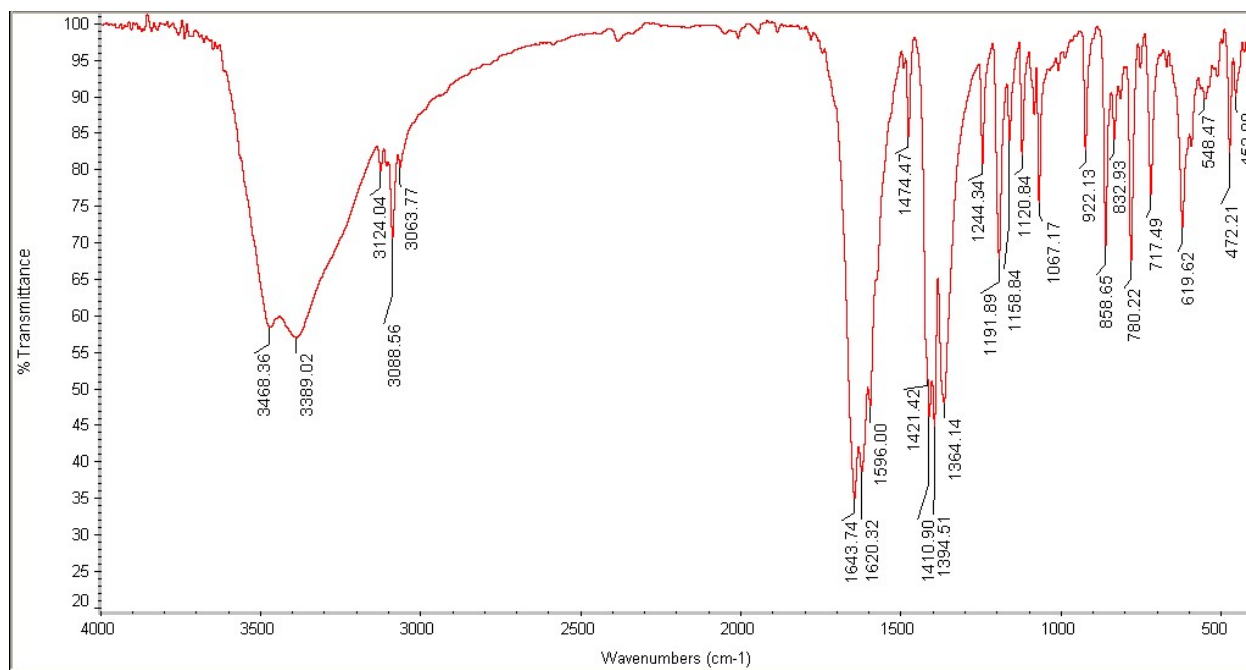

Fig. S3. FTIR spectrum of 1.

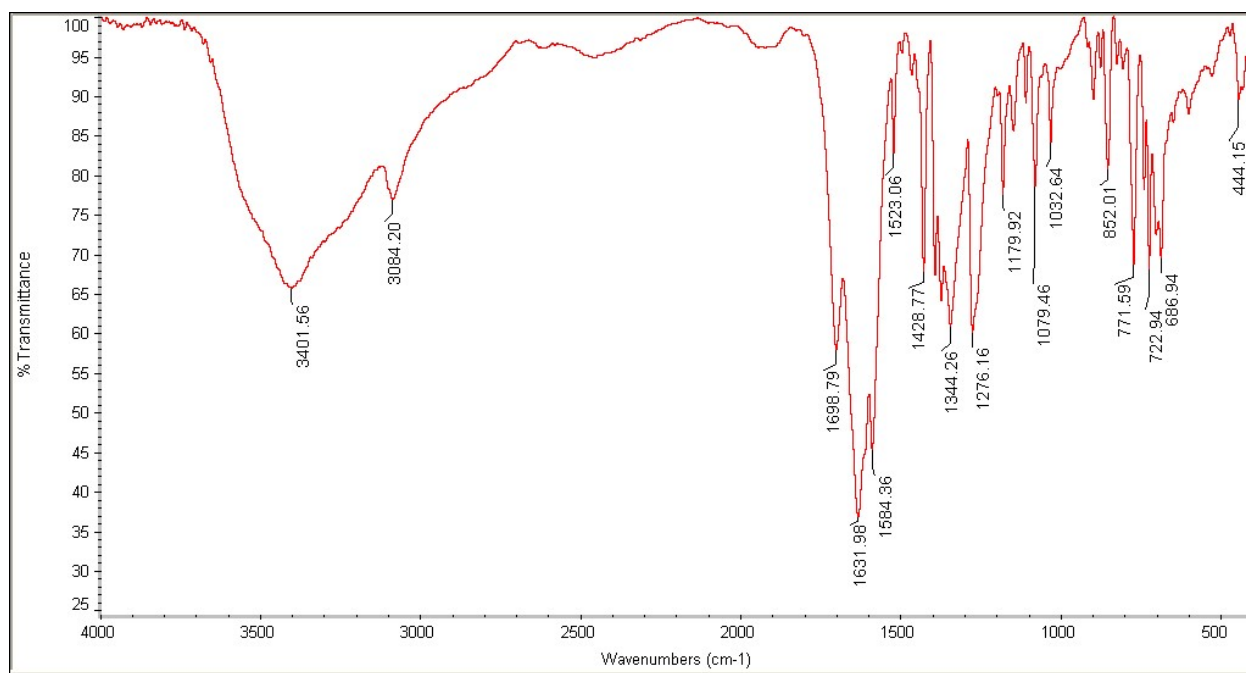

Fig. S4. FTIR spectrum of 2.

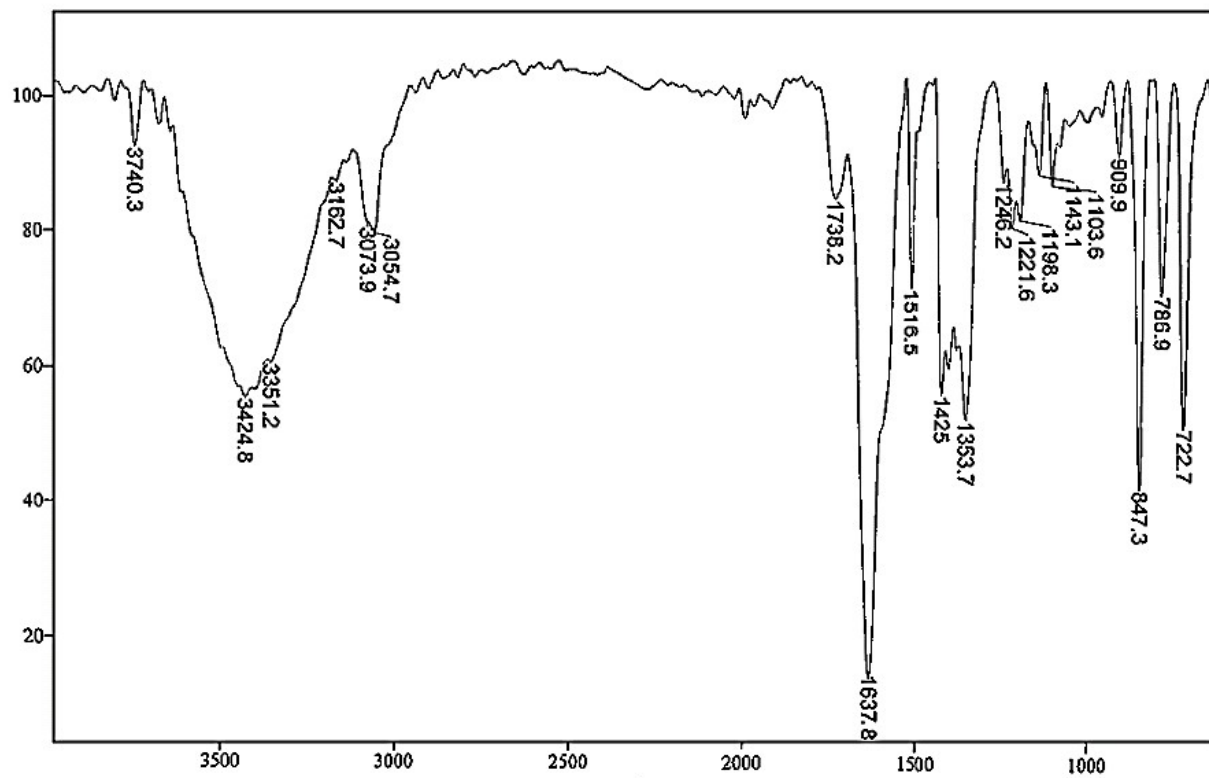

Fig. S5. FTIR spectrum of 3.

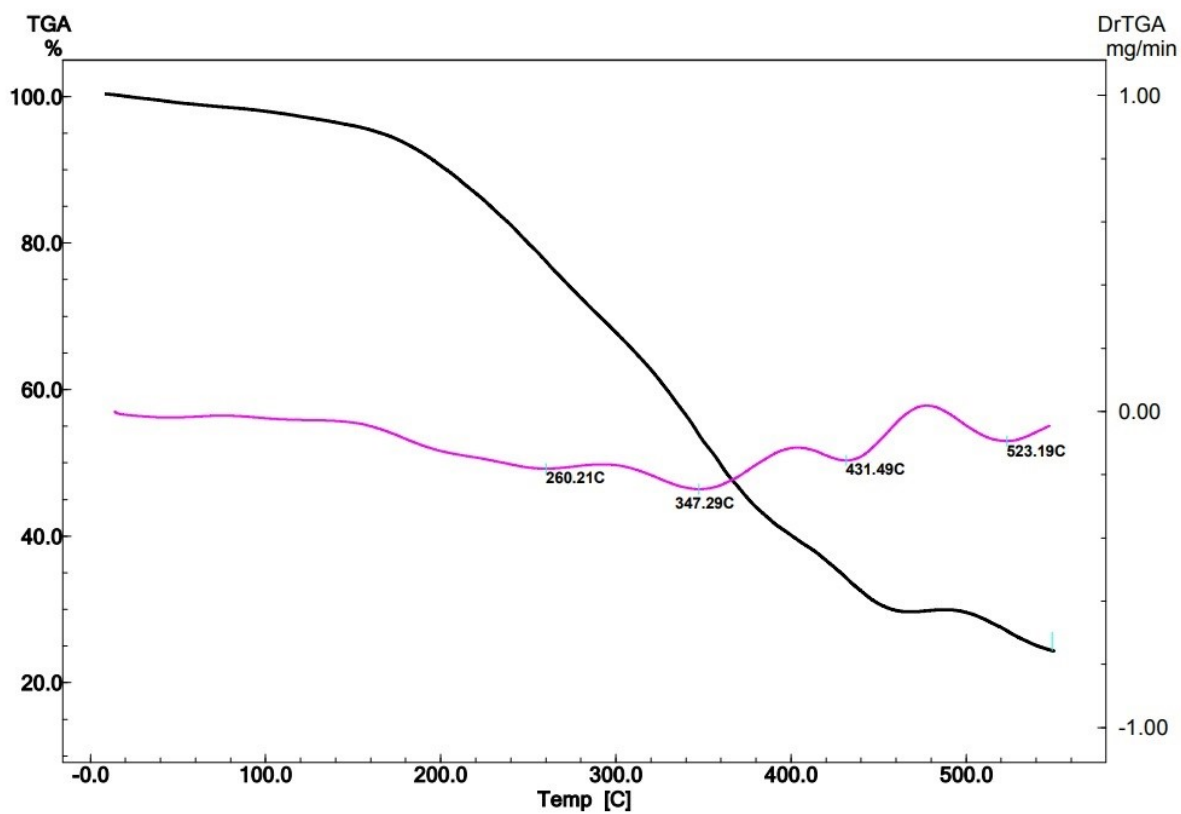

Fig. S6. TGA curve of 1.

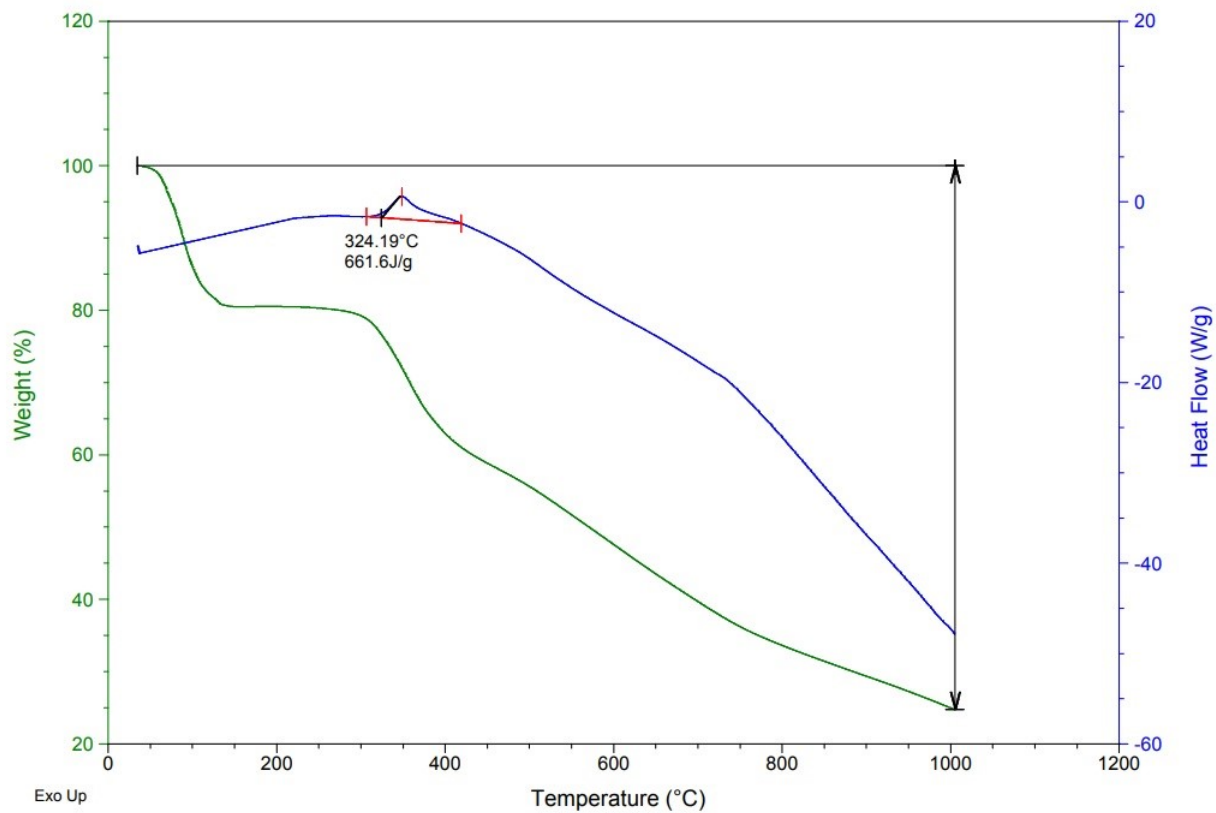

**Fig. S7.** TGA curve of **2**.

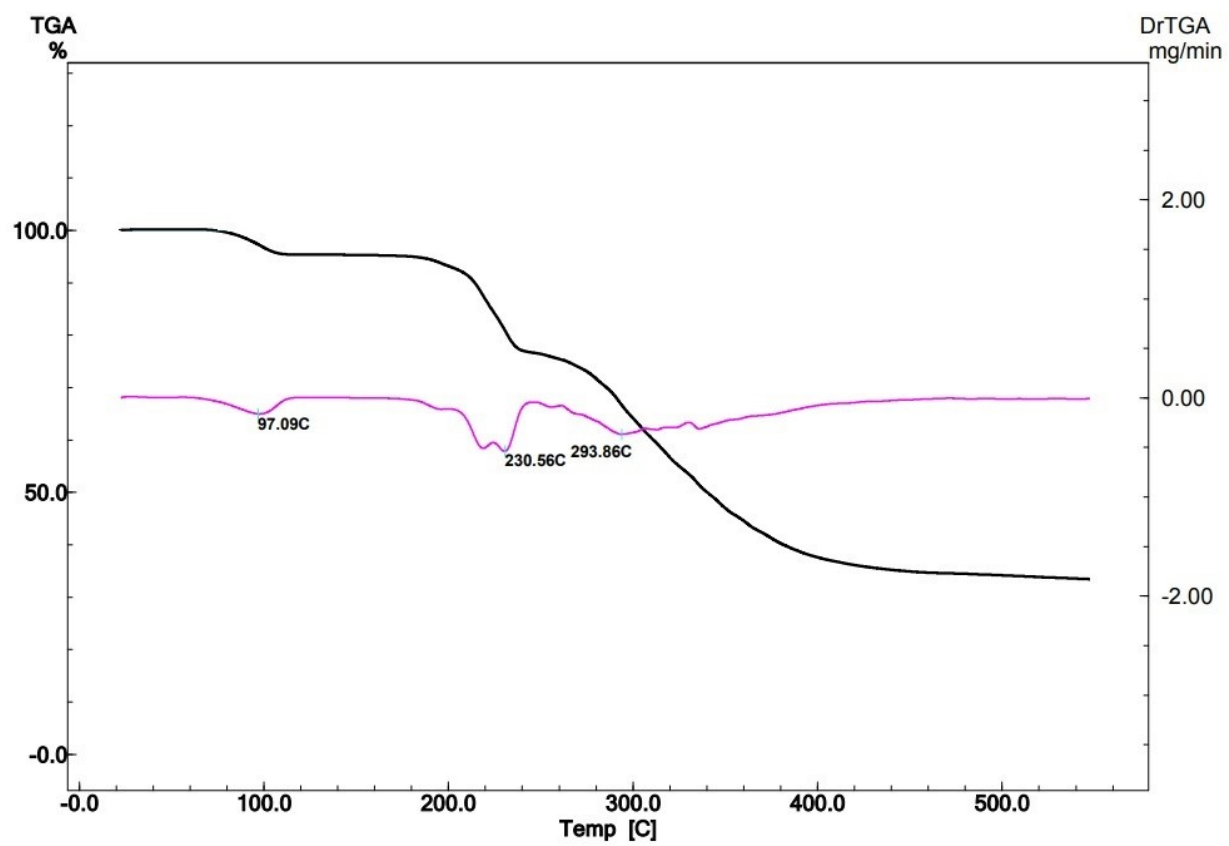

Fig. S8. TGA curve of 3.



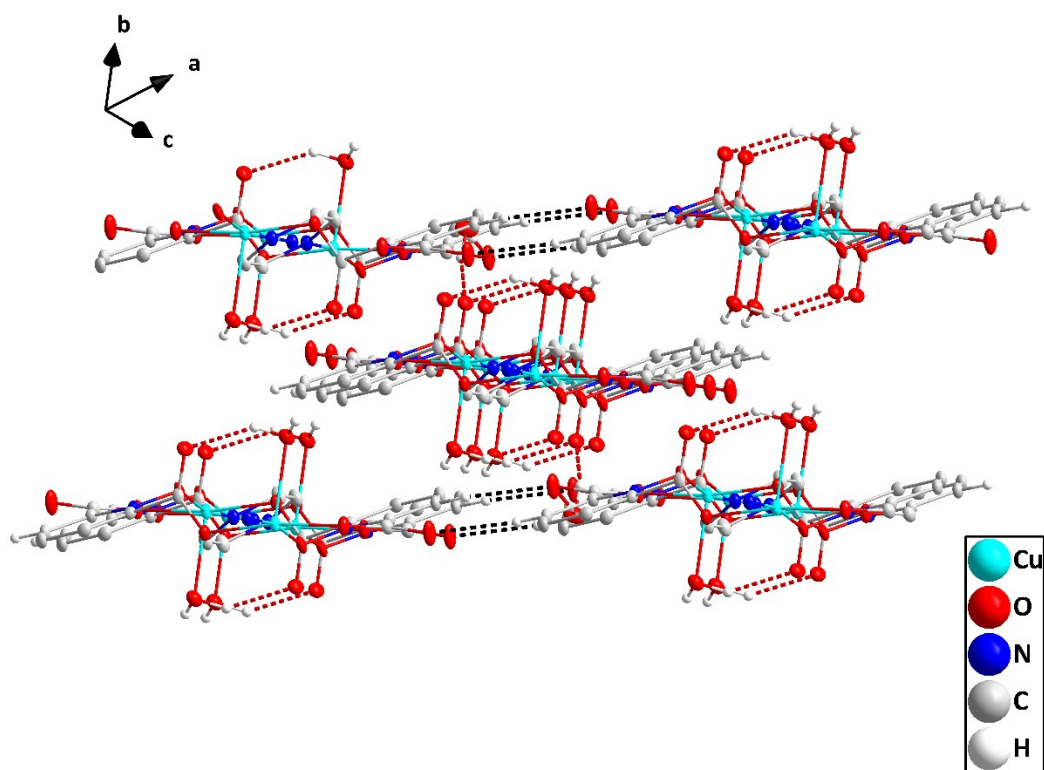

**Fig. S9.** Perspective view of the supramolecular structure of **1** with O–H···O and C–H···O hydrogen bonds depicted, respectively, by red and black dashed lines.

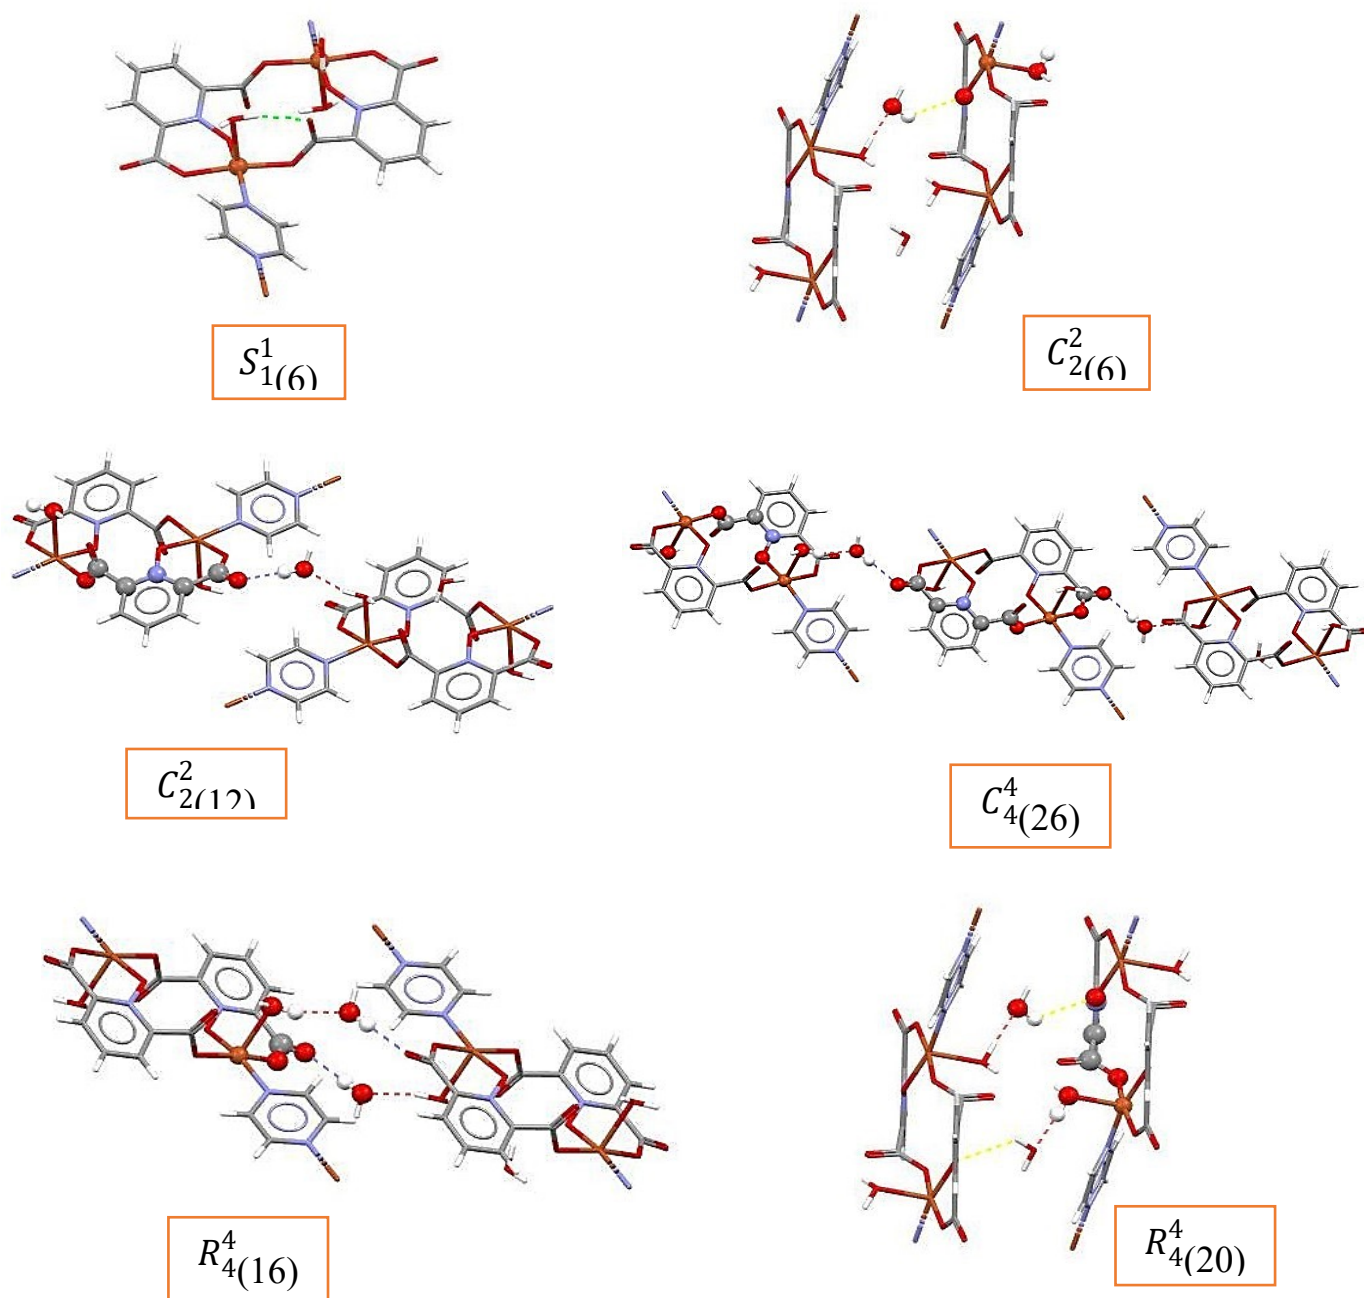

**Fig. S10.** Representation of the H-bond motifs in **1**. Color code: Cu, orange; C, grey; N, blue; O, red; H, white.

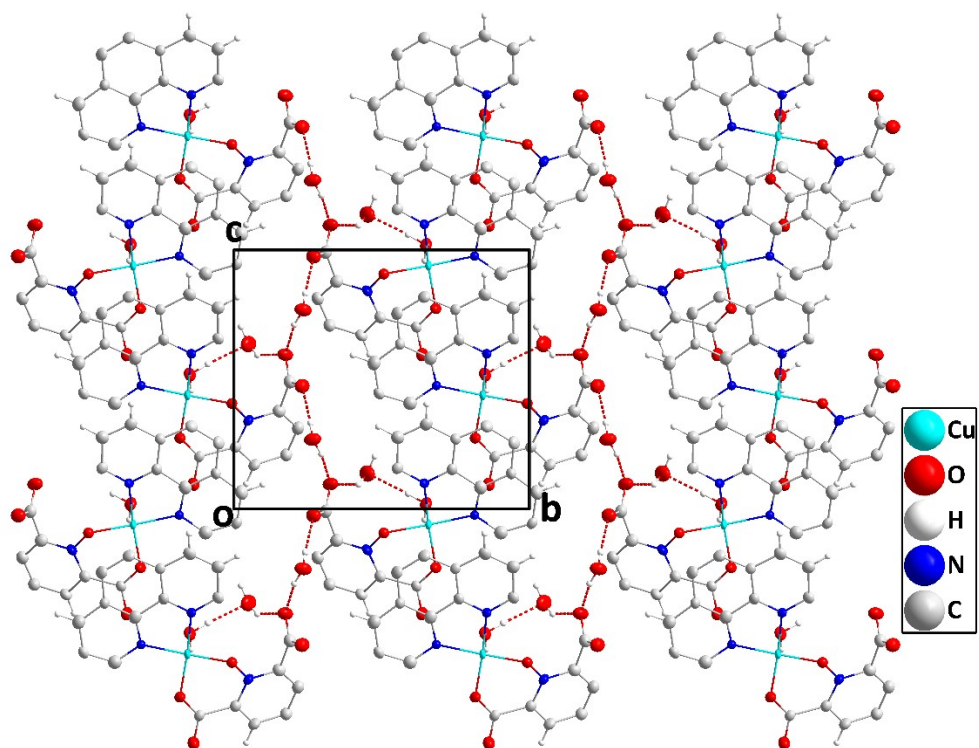

**Fig. S11.** The supramolecular structure of **2** is viewed along the *a*-axis direction with O–H...O hydrogen bonds depicted by red dashed lines.

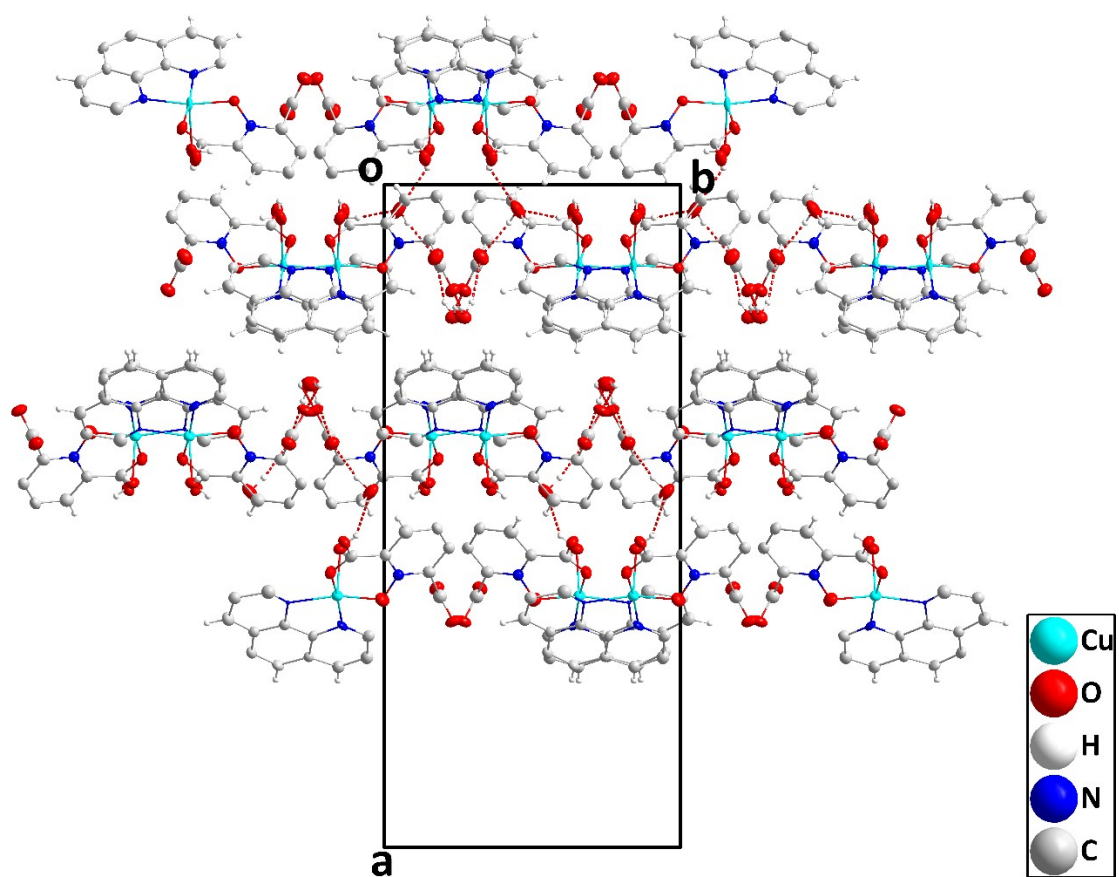

**Fig. S12.** The supramolecular structure of **2** is viewed along the *c*-axis direction with O–H···O hydrogen bonds depicted by red dashed lines. Molecules containing Cu1 and Cu2 are in the lower and upper layers, respectively.

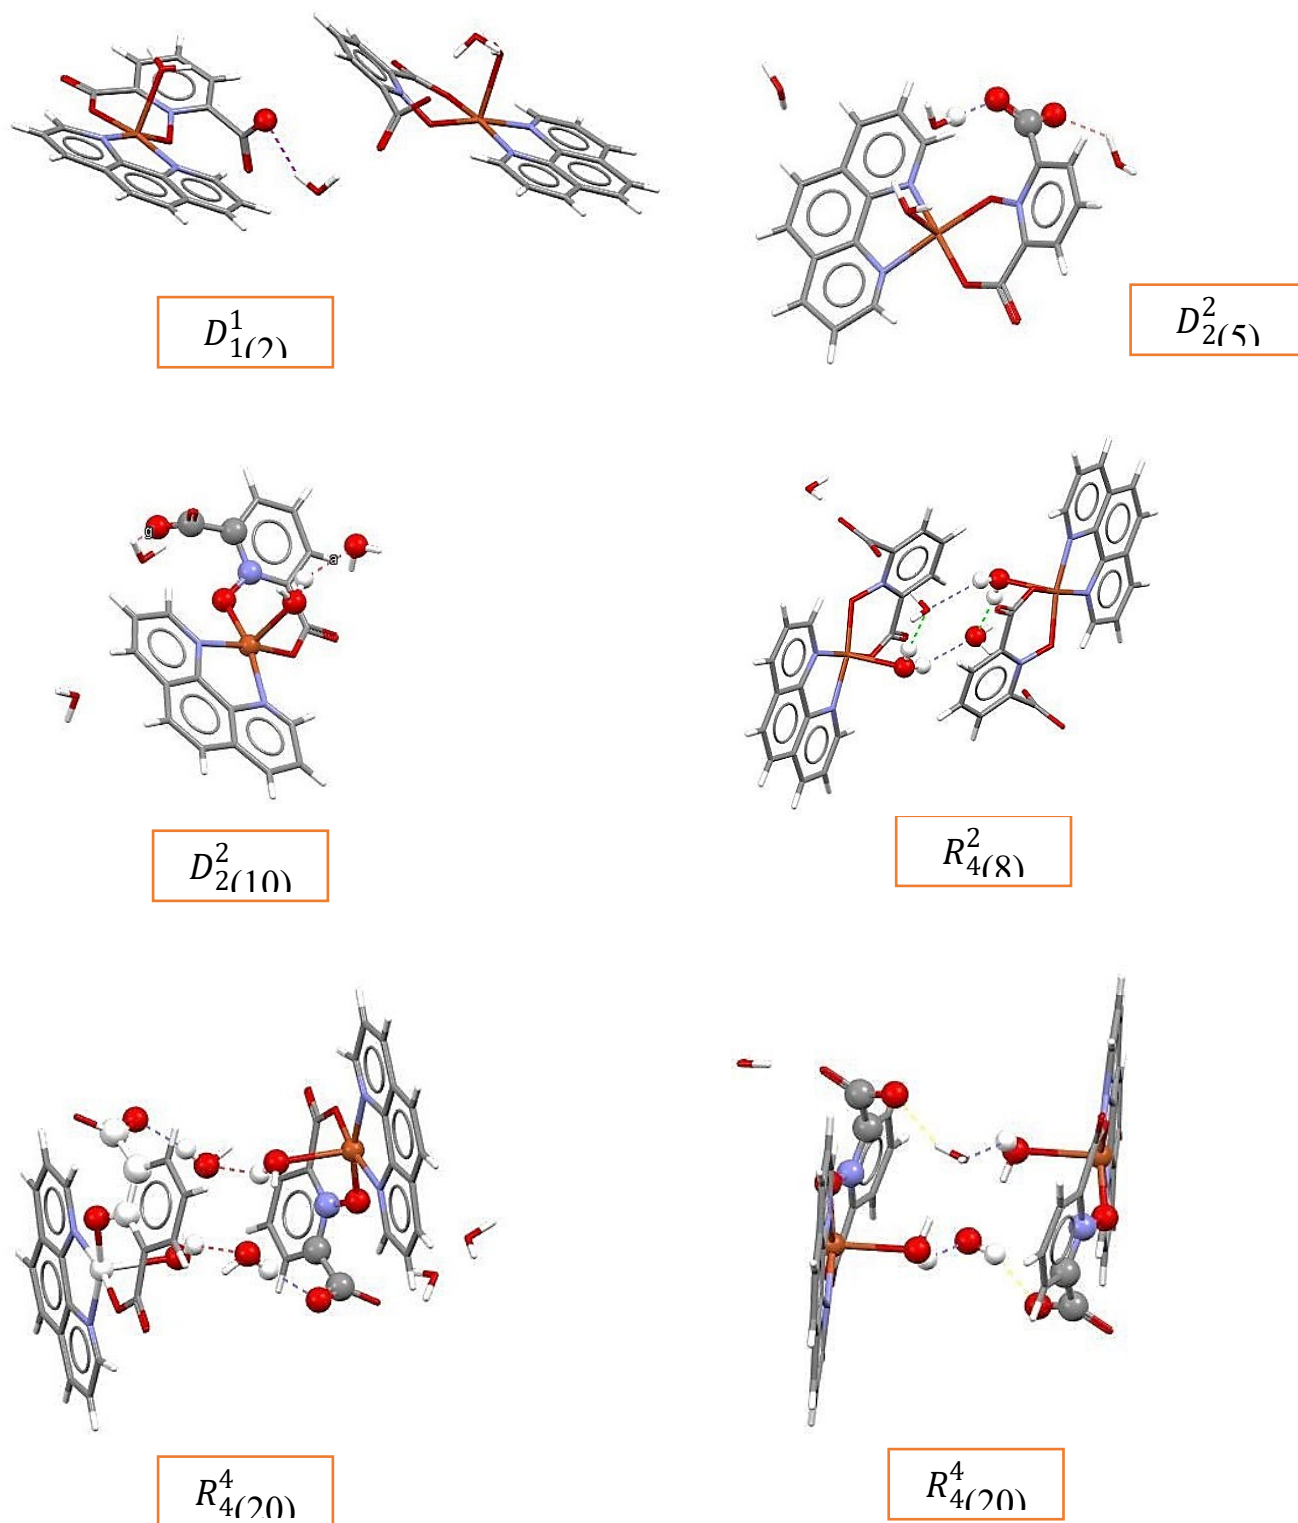

**Fig. S13.** Representation of the H-bond motifs in **2**. Color code: Cu, orange; C, grey; N, blue; O, red; H, white.

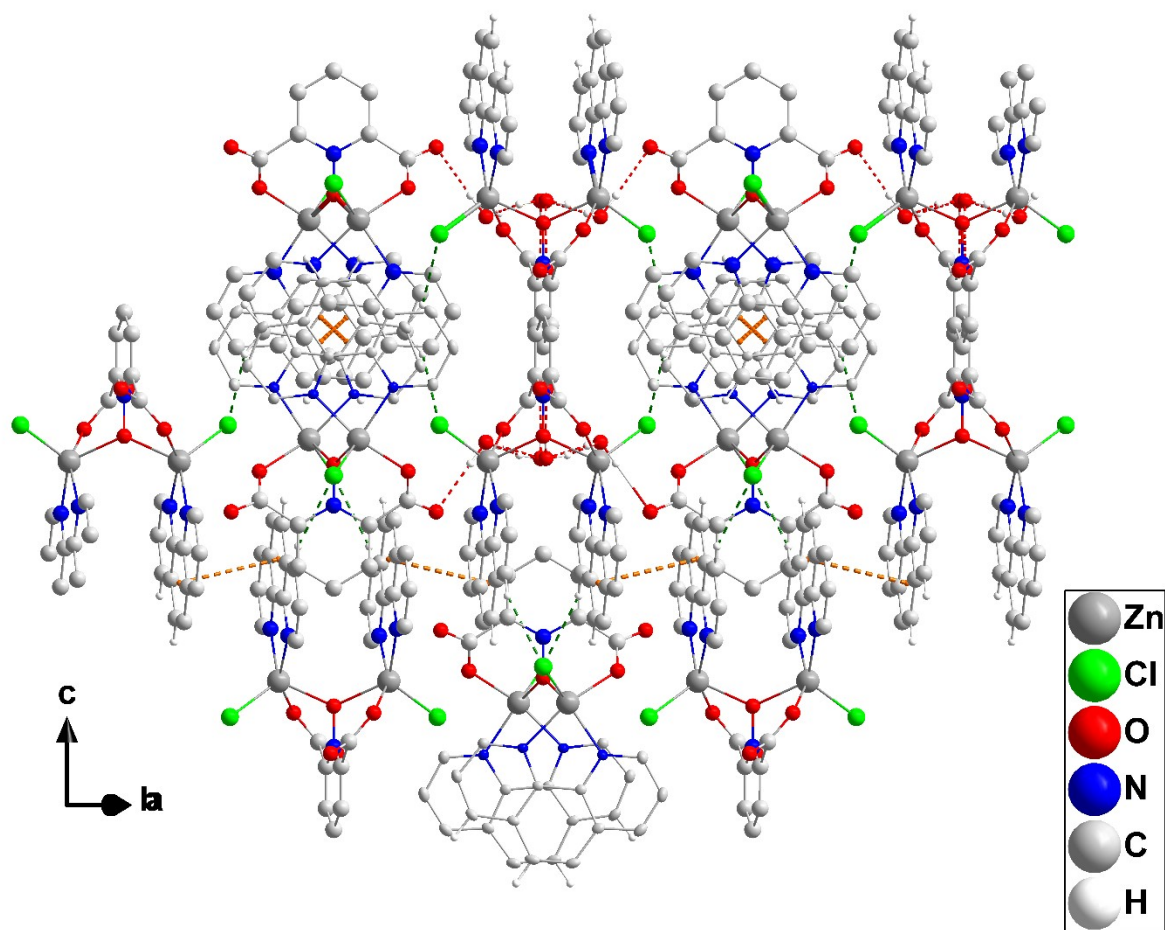

**Fig. S14.** Packing of **3** viewed along the [1-10] direction with O–H···O and C–H···Cl hydrogen bonds actively, and C–H··· $\pi$  interactions by orange dashed lines.

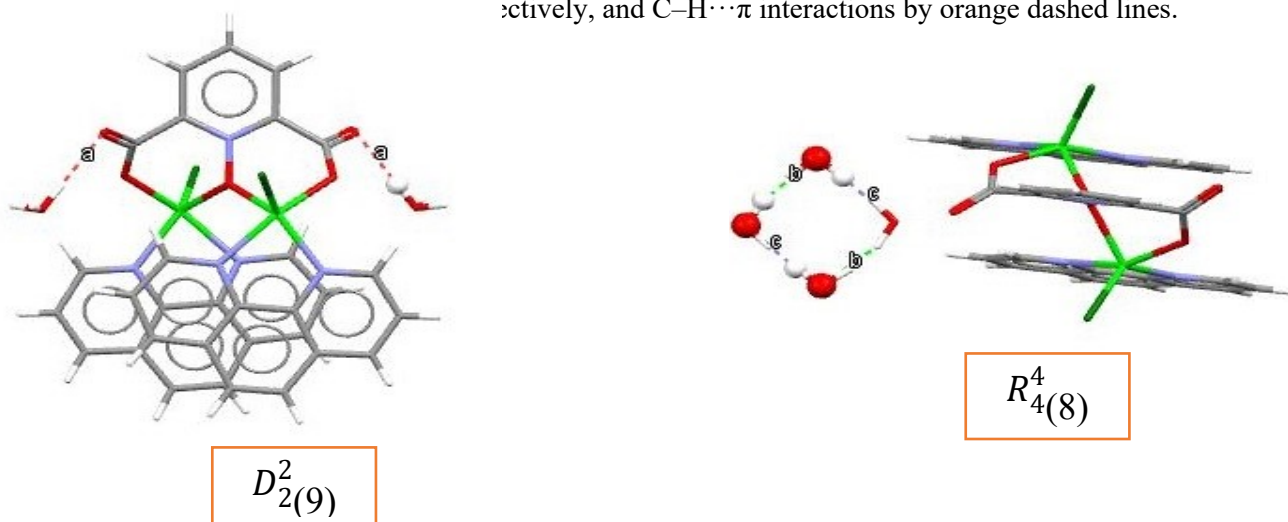

**Fig. S15.** Representation of the H-bond motifs in **3**. Color code: Zn, green; Cl, dark green; C, grey; N, blue; O, red; H, white.

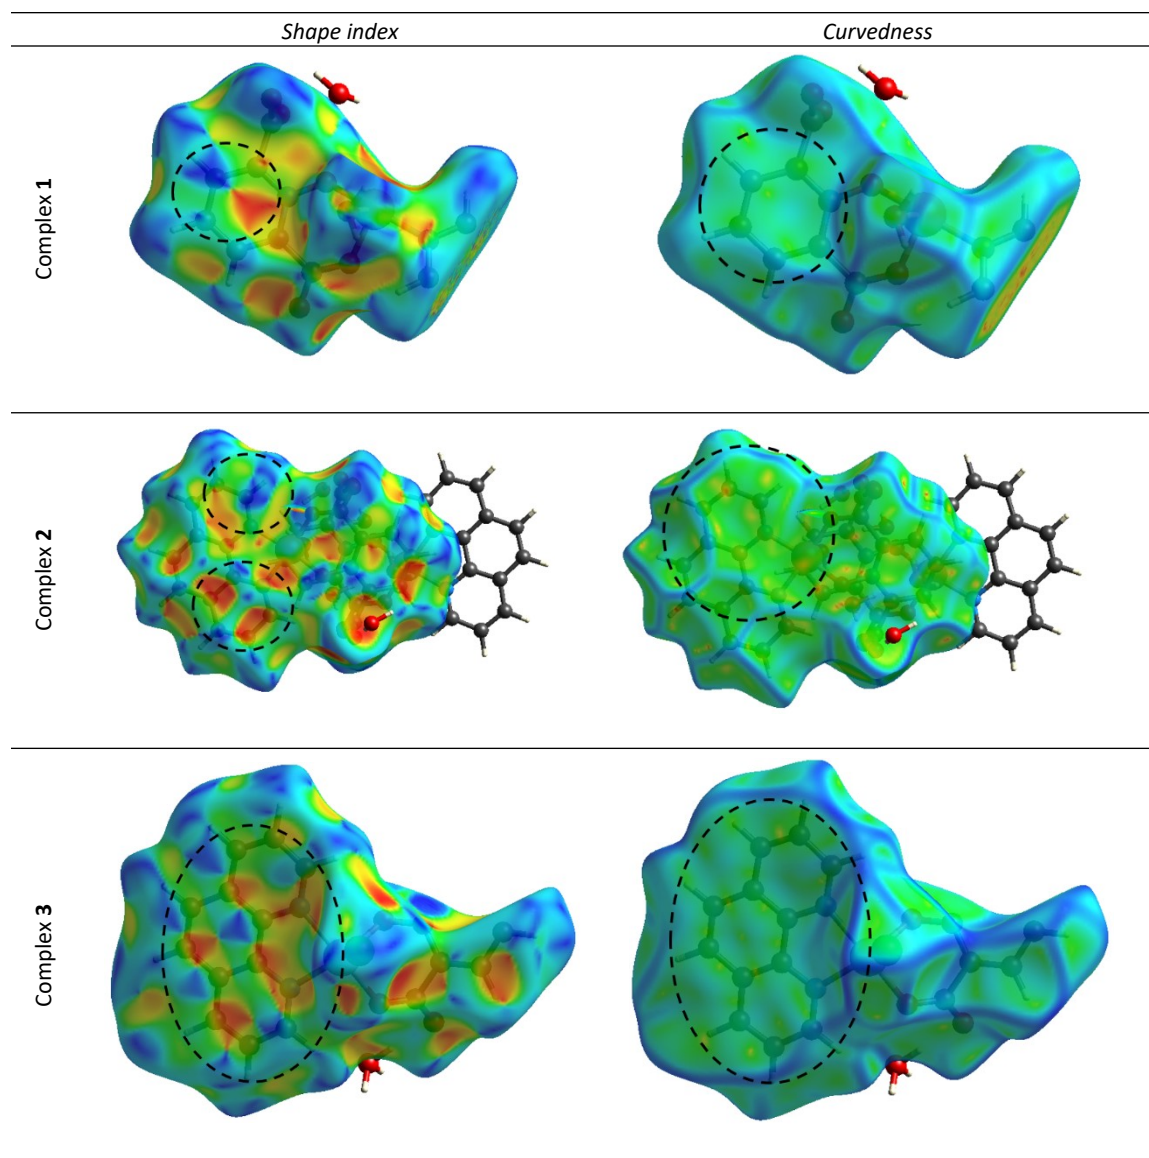

**Fig. S16.** Hirshfeld surfaces of **1-3** mapped over shape index and curvedness properties. The regions highlighted in black dashed circles correspond to regions involved in  $\pi \cdots \pi$  stacking interactions.

**Table S1.** Selected bond lengths (Å) and angles (°) of **1-3**.

| <b>1</b>   |             |            |             |  |
|------------|-------------|------------|-------------|--|
| Cu1–O1     | 1.918(10)   | Cu1–O3     | 1.932(13)   |  |
| Cu1–N2     | 2.039(12)   | Cu1–O5     | 1.955(12)   |  |
| O3–Cu1–N2  | 167.87(5)   | O1–Cu1–O5  | 171.64(4)   |  |
| O3–Cu1–O6  | 95.28(4)    | O5–Cu1–O6  | 100.52(5)   |  |
| O1–Cu1–O6  | 87.81(4)    | N2–Cu1–O6  | 96.05(5)    |  |
| O1–Cu1–O3  | 91.13(5)    | O3–Cu1–O5  | 87.56(5)    |  |
| O5–Cu1–N2  | 92.43(5)    | N2–Cu1–O1  | 87.13(4)    |  |
| <b>2</b>   |             |            |             |  |
| Cu1–O3     | 1.903(13)   | Cu1–O1     | 1.912(11)   |  |
| Cu1–N2     | 1.976(12)   | Cu1–N1     | 2.079(10)   |  |
| Cu1–O6     | 2.322(12)   | Cu2–O9     | 1.904(11)   |  |
| Cu2–O7     | 1.921(10)   | Cu2–N4     | 1.966(7)    |  |
| Cu2–N5     | 1.967(7)    | Cu2–O12    | 2.326(12)   |  |
| O3–Cu1–O1  | 92.4(5)     | O3–Cu1–N2  | 88.4(5)     |  |
| O1–Cu1–N2  | 171.1(5)    | O3–Cu1–N1  | 166.4(5)    |  |
| O1–Cu1–N1  | 90.5(4)     | N2–Cu1–N1  | 86.7(5)     |  |
| O3–Cu1–O6  | 96.6(5)     | O1–Cu1–O6  | 92.5(5)     |  |
| N2–Cu1–O6  | 96.2(5)     | N1–Cu1–O6  | 96.5(4)     |  |
| N5–Cu2–O12 | 92.2(4)     | O9–Cu2–O7  | 91.3(4)     |  |
| O9–Cu2–N4  | 91.3(4)     | O7–Cu2–N4  | 170.9(5)    |  |
| O9–Cu2–N5  | 169.6(4)    | O7–Cu2–N5  | 93.3(4)     |  |
| N4–Cu2–N5  | 82.8(3)     | O9–Cu2–O12 | 96.9(4)     |  |
| O7–Cu2–O12 | 92.1(4)     | N4–Cu2–O12 | 96.3(4)     |  |
| <b>3</b>   |             |            |             |  |
| Zn1–O1     | 2.0548 (12) | Zn1–N1     | 2.1268 (13) |  |
| Zn1–N2     | 2.0846 (14) | Zn1–Cl1    | 2.2241 (5)  |  |
| Zn1–O3     | 2.1158 (6)  |            |             |  |
| O1–Zn1–N2  | 90.46 (5)   | O3–Zn1–N1  | 85.89 (5)   |  |
| O1–Zn1–O3  | 81.35 (4)   | O1–Zn1–Cl1 | 105.00 (4)  |  |
| N2–Zn1–O3  | 127.50 (5)  | N2–Zn1–Cl1 | 125.94 (4)  |  |
| O1–Zn1–N1  | 153.55 (5)  | O3–Zn1–Cl1 | 106.15 (3)  |  |
| N2–Zn1–N1  | 79.10 (5)   | N1–Zn1–Cl1 | 100.76 (4)  |  |



**Table S2.** Selected Hydrogen bond geometry, lengths (Å), and angles (°) for **1-3**.

| D-H···A                                                                                                                                           | D-H  | H···A | D···A       | D-H···A |
|---------------------------------------------------------------------------------------------------------------------------------------------------|------|-------|-------------|---------|
| <b>1</b>                                                                                                                                          |      |       |             |         |
| C3-H3···O2 <sup>i</sup>                                                                                                                           | 0.95 | 2.35  | 3.2545 (19) | 160     |
| O6-H6A···O7 <sup>ii</sup>                                                                                                                         | 0.87 | 1.90  | 2.7389 (17) | 162     |
| O6-H6B···O4 <sup>iii</sup>                                                                                                                        | 0.87 | 1.97  | 2.7294 (17) | 146     |
| O7-H7A···O2 <sup>iv</sup>                                                                                                                         | 0.87 | 2.08  | 2.9449 (18) | 178     |
| O7-H7B···O4 <sup>iii</sup>                                                                                                                        | 0.87 | 2.04  | 2.8327 (17) | 150     |
| Symmetry codes: (i) -x, -y+1, -z; (ii) -x+1, -y, -z+1; (iii) -x+1, -y+1, -z+1; (iv) x, y, z+1.                                                    |      |       |             |         |
| <b>2</b>                                                                                                                                          |      |       |             |         |
| O6-H6B···O15 <sup>i</sup>                                                                                                                         | 0.91 | 2.14  | 2.949 (18)  | 149     |
| C15-H15···O2 <sup>ii</sup>                                                                                                                        | 0.95 | 2.46  | 3.200 (20)  | 134     |
| O12-H12A···O16                                                                                                                                    | 0.87 | 1.96  | 2.818 (18)  | 171     |
| O12-H12B···O16 <sup>iii</sup>                                                                                                                     | 0.87 | 2.23  | 2.994 (19)  | 147     |
| C34-H34···O8 <sup>iv</sup>                                                                                                                        | 0.95 | 2.51  | 3.212 (19)  | 131     |
| O13-H13A···O11                                                                                                                                    | 0.87 | 1.89  | 2.755 (16)  | 174     |
| O13-H13B···O10 <sup>v</sup>                                                                                                                       | 0.87 | 2.12  | 2.953 (17)  | 160     |
| O14-H14A···O5                                                                                                                                     | 0.87 | 2.08  | 2.732 (17)  | 131     |
| O14-H14B···O4 <sup>vi</sup>                                                                                                                       | 0.87 | 2.10  | 2.967 (17)  | 178     |
| O15-H15B···O4                                                                                                                                     | 0.87 | 1.84  | 2.707 (17)  | 172     |
| O16-H16A···O10                                                                                                                                    | 0.87 | 1.86  | 2.630 (18)  | 147     |
| Symmetry codes: (i) x+1, -y+1, -z+1; (ii) -x+1, -y+1, -z; (iii) -x, -y+1, -z+2; (iv) -x, -y+1, -z+1; (v) x, -y+1/2, z-1/2; (vi) x, -y+3/2, z-1/2. |      |       |             |         |
| <b>3</b>                                                                                                                                          |      |       |             |         |
| C15-H15···O2 <sup>i</sup>                                                                                                                         | 0.95 | 2.29  | 3.183 (2)   | 156     |
| O4-H4A···O2                                                                                                                                       | 0.87 | 1.97  | 2.836 (2)   | 178     |
| O4-H4B···O4 <sup>ii</sup>                                                                                                                         | 0.87 | 1.88  | 2.723 (4)   | 162     |
| O4-H4BA···O4 <sup>iii</sup>                                                                                                                       | 0.87 | 1.89  | 2.757 (4)   | 171     |
| Symmetry codes: (i) -x+1, -y+1, -z+1; (ii) x, -y+3/4, -z+3/4; (iii) -x+3/4, y, -z+3/4.169.5                                                       |      |       |             |         |
